# Supplementary material for: Exosomes from miR-29a-modified adipose-derived mesenchymal stem cells reduce excessive scar formation by inhibiting TGF-β2/Smad3 signaling
Source: PubMed Central journal article supplement — Mol Med Rep. 2021 Sep 2;24(5):758. doi: 10.3892/mmr.2021.12398 (PMC8436211; doi:10.3892/mmr.2021.12398), 2021-09-02

Figure S1. Transfection efficiency measured via reverse transcription-quantitative PCR. <sup>ns</sup>P>0.05; <sup>\*\*</sup>P<0.001, <sup>\*\*\*\*</sup>P<0.0001 vs. NC group; <sup>###</sup>P<0.001, <sup>####</sup>P<0.0001 vs. respective NC. NC, negative control; mimics-NC, NC of miR-29a mimics; mimics, miR-29a mimics; inhibitor-NC, NC of miR-29a inhibitor; inhibitor, miR-29a inhibitor.; miR, microRNA; ns, not significant.

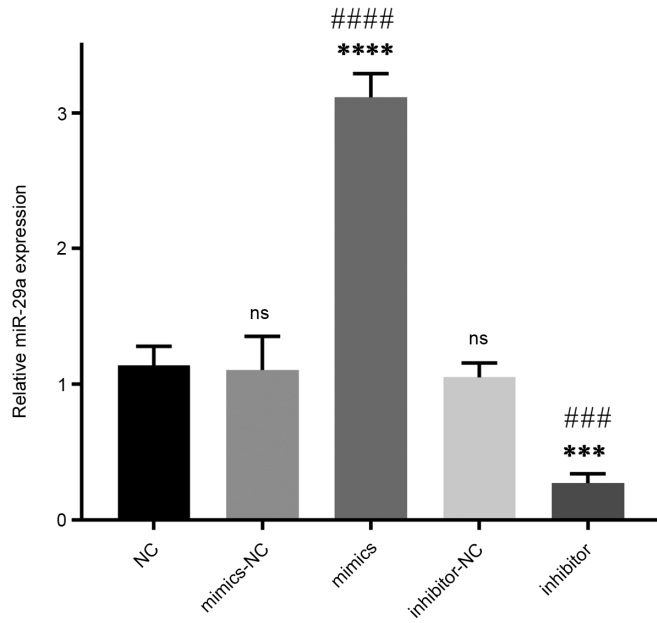

Supplement: Supplementary_Data.pdf [file Supplementary_Data.pdf]
